# Supplementary material for: High capacity and fast Na+ transport in the SbPS4 material by Bi3+ substitution for sodium-ion batteries
Source: Royal Society of Chemistry journal article supplement (doi:10.1039/d2qi01899c), 2022-01-01
Supplement: d2qi01899c1.pdf [file d2qi01899c1.pdf]

## Supporting information

### **High capacity and fast Na<sup>+</sup> transportation in SbPS<sub>4</sub> material by Bi<sup>3+</sup> substitution for sodium-ion batteries**

*Qi-Min Yin<sup>a+</sup>, Zhen-Yi Gu<sup>b+</sup>, Hong-Yan Lü<sup>\*a</sup>, Weiping Guo<sup>c</sup>, Miao Du<sup>a</sup>, Yi-Tong Liu<sup>a</sup>, Yan Liu<sup>a</sup>, Yong-Li Heng<sup>b</sup>, Zhong-Zhen Luo<sup>\*c</sup>, and Xing-Long Wu<sup>\*a,b</sup>*

*<sup>a</sup> Department of Chemistry, Northeast Normal University, Changchun, Jilin 130024, P. R. China*

*<sup>b</sup> MOE Key Laboratory for UV Light-Emitting Materials and Technology, Northeast Normal University, Ministry of Education, Changchun, Jilin 130024, P. R. China*

*<sup>c</sup> Key Laboratory of Eco-materials Advanced Technology, College of Materials Science and Engineering, Fuzhou University, Fuzhou, 350108, P. R. China*

*+ Q.-M. Yin and Z.-Y. Gu contributed equally.*

## Contents in the Supporting Information

|                                                                                                                                                                                |    |
|--------------------------------------------------------------------------------------------------------------------------------------------------------------------------------|----|
| 1. Materials Preparation .....                                                                                                                                                 | 4  |
| 1.1 Synthesis of $Sb_{1-x}Bi_xPS_4$ anode materials .....                                                                                                                      | 4  |
| 1.2 Synthesis of $Na_3V_2(PO_4)_2O_2F$ cathode materials .....                                                                                                                 | 4  |
| 1.3 Material Characterization .....                                                                                                                                            | 5  |
| 1.4 Electrochemical Measurements .....                                                                                                                                         | 5  |
| 2. Results and discussion .....                                                                                                                                                | 7  |
| 2.1 Structural Characterization of $Sb_{0.7}Bi_{0.3}PS_4$ .....                                                                                                                | 7  |
| Figure S1. SEM of $Sb_{1-x}Bi_xPS_4$ (a) $SbPS_4$ (b) $Sb_{0.9}Bi_{0.1}PS_4$ (c) $Sb_{0.8}Bi_{0.2}PS_4$ and (d) $Sb_{0.6}Bi_{0.4}PS_4$ .....                                   | 7  |
| 2.2 Electrochemical Performance of $Sb_{1-x}Bi_xPS_4$ .....                                                                                                                    | 8  |
| Figure S2. Long cycles of $Sb_{0.7}Bi_{0.3}PS_4$ and $Sb_{0.6}Bi_{0.4}PS_4$ in half cells at $1 A g^{-1}$ .....                                                                | 8  |
| Figure S3. Galvanostatic curves of $Sb_{0.7}Bi_{0.3}PS_4$ in half cells at $1 A g^{-1}$ . .....                                                                                | 8  |
| Figure S4. EIS tests for $Sb_{1-x}Bi_xPS_4$ .....                                                                                                                              | 9  |
| 2.3 Kinetics Analysis of $Sb_{0.7}Bi_{0.3}PS_4$ .....                                                                                                                          | 9  |
| Figure S5. $SbPS_4$ material of (a) CV curves at different scan rates, (b) Normalized contribution ratio of capacitive and diffusion-controlled capacities. ....               | 9  |
| Figure S6. $Sb_{0.9}Bi_{0.1}PS_4$ material of (a) CV curves at different scan rates, (b) Normalized contribution ratio of capacitive and diffusion-controlled capacities. .... | 10 |
| Figure S7. $Sb_{0.8}Bi_{0.2}PS_4$ material of (a) CV curves at different scan rates, (b) Normalized contribution ratio of capacitive and diffusion-controlled capacities. .... | 10 |
| Figure S8. $Sb_{0.6}Bi_{0.4}PS_4$ material of (a) CV curves at different scan rates, (b) Normalized contribution ratio of capacitive and diffusion-controlled capacities. .... | 11 |
| 2.4 Full cell Application .....                                                                                                                                                | 11 |
| Figure S9. XRD of $Na_3V_2(PO_4)_2O_2F$ materials .....                                                                                                                        | 11 |
| Figure S10. SEM of $Na_3V_2(PO_4)_2O_2F$ materials .....                                                                                                                       | 12 |
| Figure S11. Electrochemical properties of $Na_3V_2(PO_4)_2O_2F$ in half cells: (a) Rate capabilities from 0.1 C to 5 C and (b) the corresponding galvanostatic curves. ....    | 12 |
| Figure S12. Practical demonstrations of coin-type full battery for lighting LED bulbs. ....                                                                                    | 13 |
| Table S1 Comparison of $Sb_{0.7}Bi_{0.3}PS_4$ materials from our work with previously reported ones of anode materials for sodium ion batteries. ....                          | 13 |
| References .....                                                                                                                                                               | 13 |

## Experimental section

### 1. Materials Preparation

All of the chemical reagents were purchased from Aladdin and used as received without any purification.

#### *1.1 Synthesis of $Sb_{1-x}Bi_xPS_4$ anode materials*

The  $Sb_{1-x}Bi_xPS_4$  anode materials were prepared according to the previous report.<sup>1</sup> The corresponding stoichiometric ratio of Sb, Bi, P and S for  $Sb_{1-x}Bi_xPS_4$  are added into the molten silicon tube and sealed under vacuum ( $<10^{-4}$  Torr). The mixture rises to 200 °C for 4 hours, then rises to 650 °C for 48 hours, and then cools to 50 °C at 12 °C/min.

#### *1.2 Synthesis of $Na_3V_2(PO_4)_2O_2F$ cathode materials*

The  $Na_3V_2(PO_4)_2O_2F$  cathode materials were prepared via a simple hydrothermal method according to our recent report.<sup>2</sup> Briefly,  $V_2O_5$  and  $H_2C_2O_4$  with the molar ratio of 1:3 were dissolved in the distilled water under stirring at 70 °C for 1 hour. And then, stoichiometric  $NH_4H_2PO_4$  and NaF were added into the above-formed transparent solution under continuous stirring. After the pH of the solution was adjusted to the required value of 7 by using ammonium hydroxide, the obtained solution was transferred into a Teflon-lined autoclave and heated at the setting temperature of 170 °C for 12 hours followed by a natural cooling outside the oven to room temperature. Finally, the  $Na_3V_2(PO_4)_2O_2F$  products could be easily collected after washing the precipitation with distilled water and ethanol several times, and then drying in a vacuum at 80 °C.

### ***1.3 Material Characterization***

The XRD patterns of  $\text{Sb}_{1-x}\text{Bi}_x\text{PS}_4$  and  $\text{Na}_3\text{V}_2(\text{PO}_4)_2\text{O}_2\text{F}$  were performed by X-ray powder diffractometer (XRD, Bruker D8) with Cu  $K\alpha$  at  $\lambda = 0.15406$  nm to investigate the phase composition. The elemental composition and valence states of  $\text{Sb}_{0.7}\text{Bi}_{0.3}\text{PS}_4$  were characterized by the X-ray photoelectron spectrum (XPS, Thermo). The morphology features of  $\text{Sb}_{1-x}\text{Bi}_x\text{PS}_4$  were tested by transmission electron microscopy (TEM, JEOL-2100F) and scanning electron microscopy (SEM, Hitachi-SU8000). The distribution of elements for  $\text{Sb}_{0.7}\text{Bi}_{0.3}\text{PS}_4$  was observed by energy-dispersive X-ray spectroscopy (EDS).

### ***1.4 Electrochemical Measurements***

The CR2032-type coin cells were assembled in the argon-filled glove at an atmosphere that is  $\text{H}_2\text{O}$  and  $\text{O}_2$  lower than 0.1 ppm. The electrolyte was composed of 1.0 M  $\text{NaClO}_4$  in propylene carbonate with 5% fluoroethylene carbonate. The glass fibrous membrane was used as the separator. The sodium metal was used as the reference and counter electrode in the half cell. The electrode of  $\text{Sb}_{1-x}\text{Bi}_x\text{PS}_4$  was composed of 70 wt.% active materials, 20 wt.% carbon black and 10 wt.% sodium alginate mixed with DI water on Cu foil, then dried in a vacuum oven at 60 °C overnight.

The average mass loading of  $\text{Sb}_{1-x}\text{Bi}_x\text{PS}_4$  material is about 1 mg  $\text{cm}^{-2}$  in the half/full sodium ion batteries. The range voltage of  $\text{Sb}_{1-x}\text{Bi}_x\text{PS}_4$  was 0.05-2 V vs.  $\text{Na}^+/\text{Na}$  tested by LAND CT2001A. The cyclic voltammetry (CV) was performed on the CHI 750 electrochemical workstation of ChenHua. The Electrochemical Impedance Spectroscopy of  $\text{Sb}_{0.7}\text{Bi}_{0.3}\text{PS}_4$  material was carried out on Solartron Frequency Response

Analyzer 1260A under the frequency of 100 kHz to 1 Hz. The Electrochemical Impedance Spectroscopy of  $\text{Sb}_{1-x}\text{Bi}_x\text{PS}_4$  material was carried out on CHI 750 under the frequency of 100 kHz to 0.1 Hz. For full battery assembly, the  $\text{Na}_3\text{V}_2(\text{PO}_4)_2\text{O}_2\text{F}$  and  $\text{Sb}_{0.7}\text{Bi}_{0.3}\text{PS}_4$  materials were used as cathode and anode, respectively. The electrochemical performance of  $\text{Na}_3\text{V}_2(\text{PO}_4)_2\text{O}_2\text{F}$  was tested at the potential of 2.0 – 4.5 V vs.  $\text{Na}^+/\text{Na}$  in the half cell. The full battery of  $\text{Na}_3\text{V}_2(\text{PO}_4)_2\text{O}_2\text{F} // \text{Sb}_{0.7}\text{Bi}_{0.3}\text{PS}_4$  was tested on the voltage range of 1-3.5 V. The electrode of  $\text{Na}_3\text{V}_2(\text{PO}_4)_2\text{O}_2\text{F}$  was composed of active materials, carbon black and sodium alginate mixed with DI water in a mass ratio of 7:2:1 sodiated chemically before assembling the full cell. The mass ratio of cathode and anode was 2:1 for the full cell tests. Before the assembly of the full cell, all  $\text{Sb}_{0.7}\text{Bi}_{0.3}\text{PS}_4$  anodes were subjected to electrochemical pre-sodiation. In pre-sodiation specific process, the  $\text{Sb}_{0.7}\text{Bi}_{0.3}\text{PS}_4$  anodes cycled 4 times at  $0.2 \text{ A g}^{-1}$ .

The relationship between the peak current  $i$  and scan rate  $\nu$  can be described as the following formulas:

$$i = a\nu^b$$

$$\log(i) = b\log(\nu) + \log(a)$$

The  $a$  is a constant, and  $b$  is the slope of  $\log(i)$  versus  $\log(\nu)$  plots. The  $b$  value approximates 0.5 representing a more diffusion-controlled behavior. While the value of  $b$  approaches 1, the electrochemical process contributes to capacitive-controlled behavior.

The capacitance contribution at a certain scan rate can be calculated by using the following formulas:

$$i = k_1v + k_2v^{1/2}$$

Herein, the  $k_1v$  and  $k_2v^{1/2}$  represent the capacitive contribution and diffusion-controlled contribution, respectively.

## 2. Results and discussion

### 2.1 Structural Characterization of $Sb_{0.7}Bi_{0.3}PS_4$

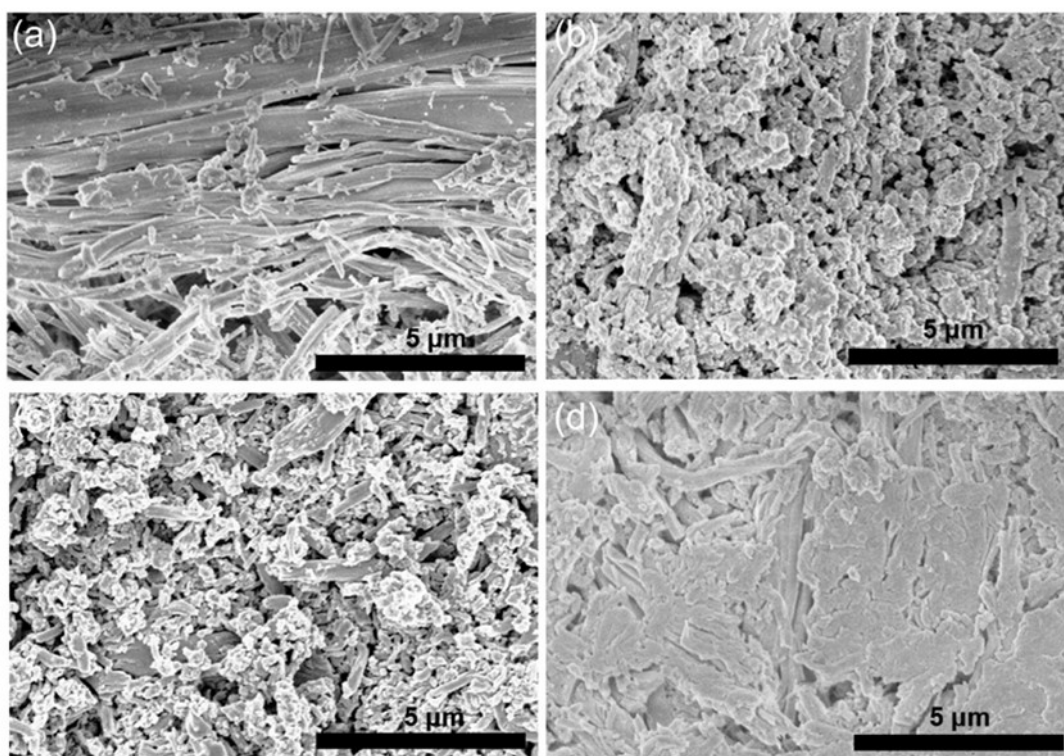

**Figure S1.** SEM of  $Sb_{1-x}Bi_xPS_4$  (a)  $SbPS_4$  (b)  $Sb_{0.9}Bi_{0.1}PS_4$  (c)  $Sb_{0.8}Bi_{0.2}PS_4$  and (d)  $Sb_{0.6}Bi_{0.4}PS_4$ .

### 2.2 Electrochemical Performance of $Sb_{1-x}Bi_xPS_4$

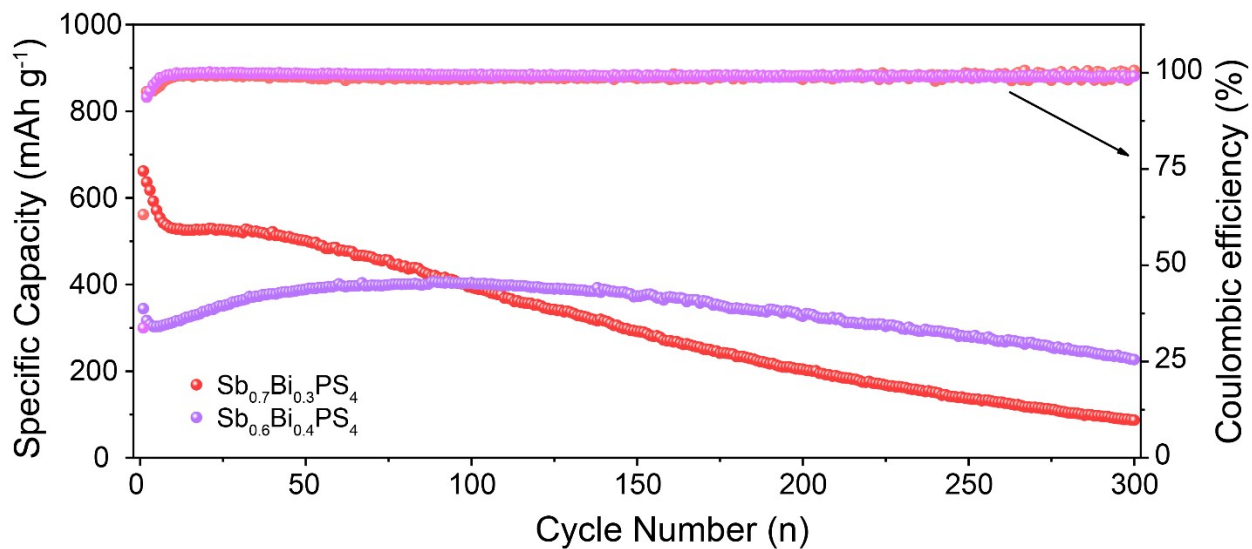

**Figure S2.** Long cycles of  $\text{Sb}_{0.7}\text{Bi}_{0.3}\text{PS}_4$  and  $\text{Sb}_{0.6}\text{Bi}_{0.4}\text{PS}_4$  in half cells at  $1 \text{ A g}^{-1}$

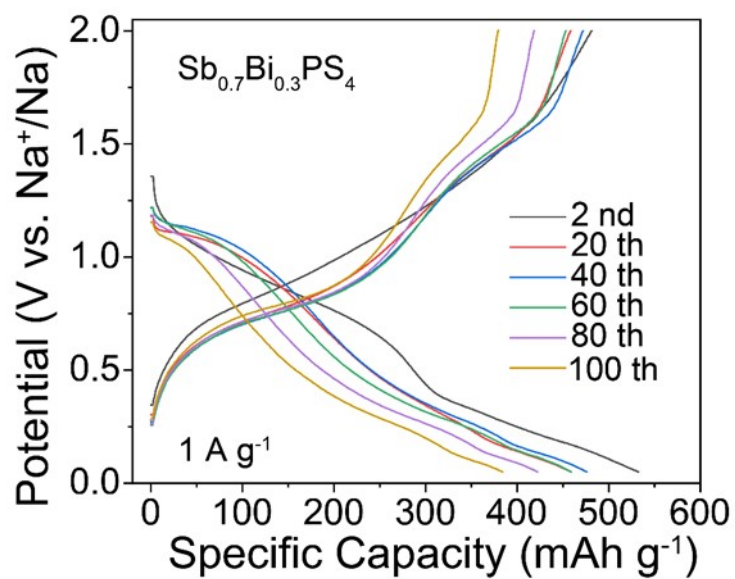

**Figure S3.** Galvanostatic curves of  $\text{Sb}_{0.7}\text{Bi}_{0.3}\text{PS}_4$  in half cells at  $1 \text{ A g}^{-1}$ .

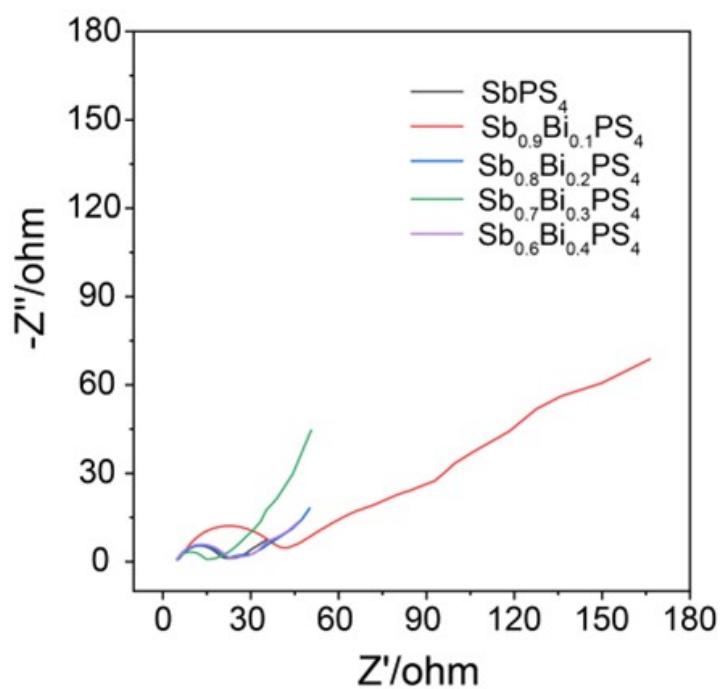

**Figure S4.** EIS tests for  $\text{Sb}_{1-x}\text{Bi}_x\text{PS}_4$ .

### 2.3 Kinetics Analysis of $\text{Sb}_{0.7}\text{Bi}_{0.3}\text{PS}_4$

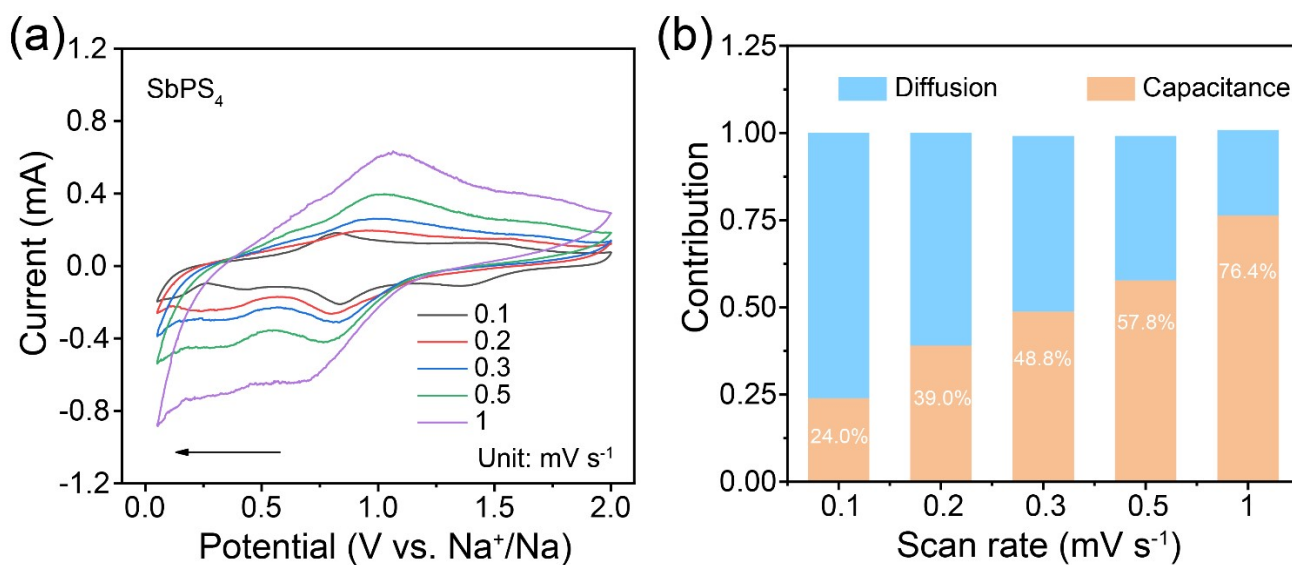

**Figure S5.**  $\text{SbPS}_4$  material of (a) CV curves at different scan rates, (b) Normalized contribution ratio of capacitive and diffusion-controlled capacities.



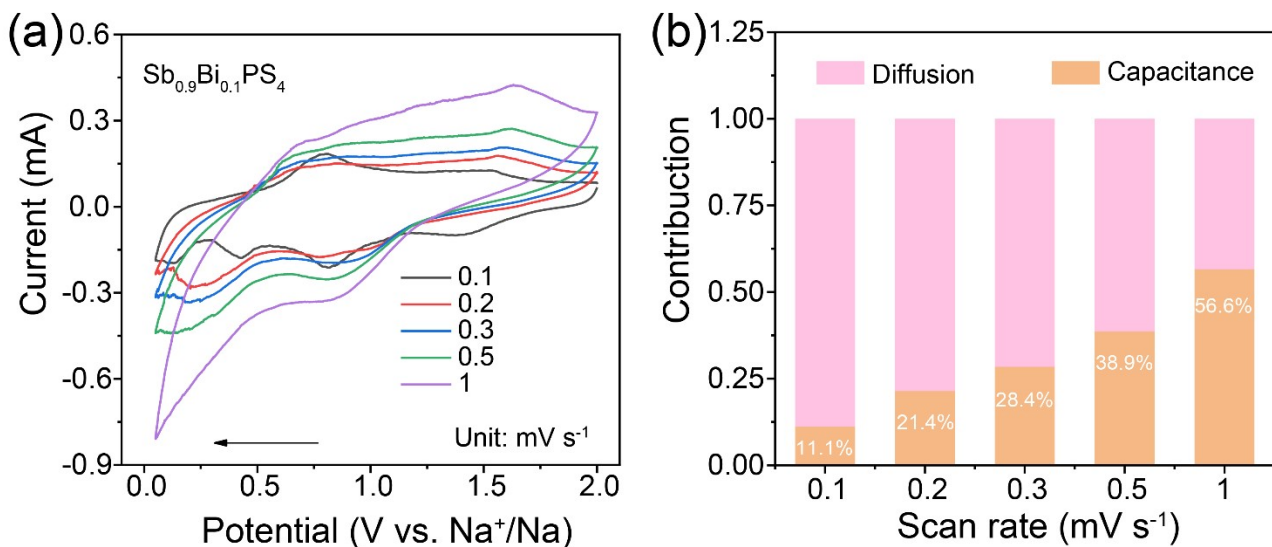

**Figure S6.**  $\text{Sb}_{0.9}\text{Bi}_{0.1}\text{PS}_4$  material of (a) CV curves at different scan rates, (b) Normalized contribution ratio of capacitive and diffusion-controlled capacities.

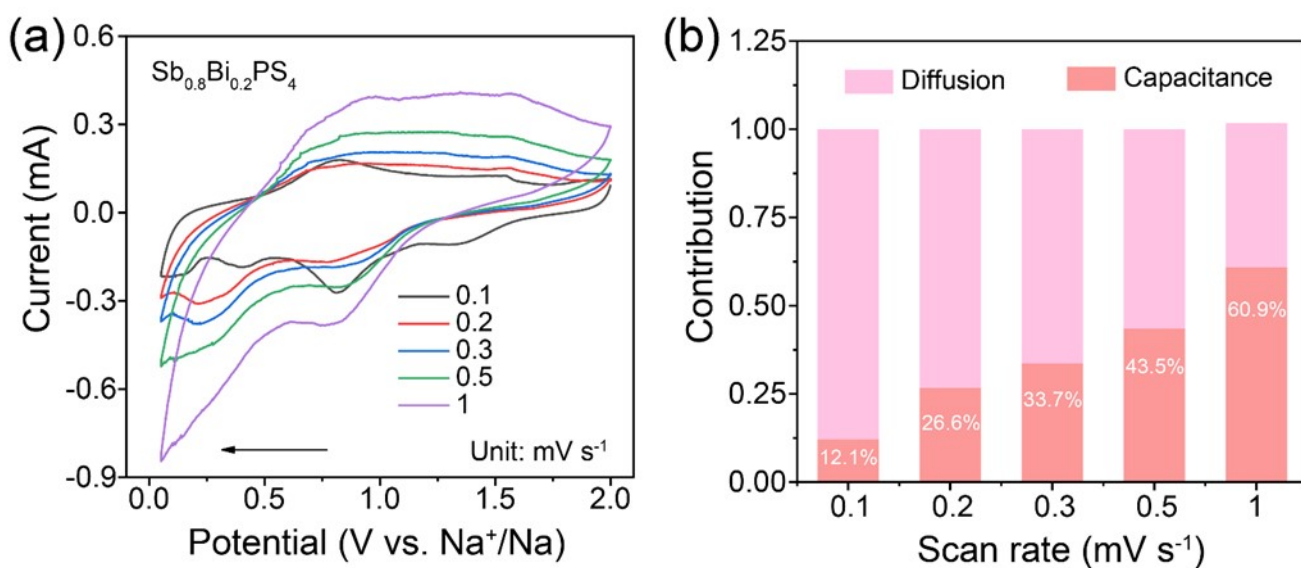

**Figure S7.**  $\text{Sb}_{0.8}\text{Bi}_{0.2}\text{PS}_4$  material of (a) CV curves at different scan rates, (b) Normalized contribution ratio of capacitive and diffusion-controlled capacities.

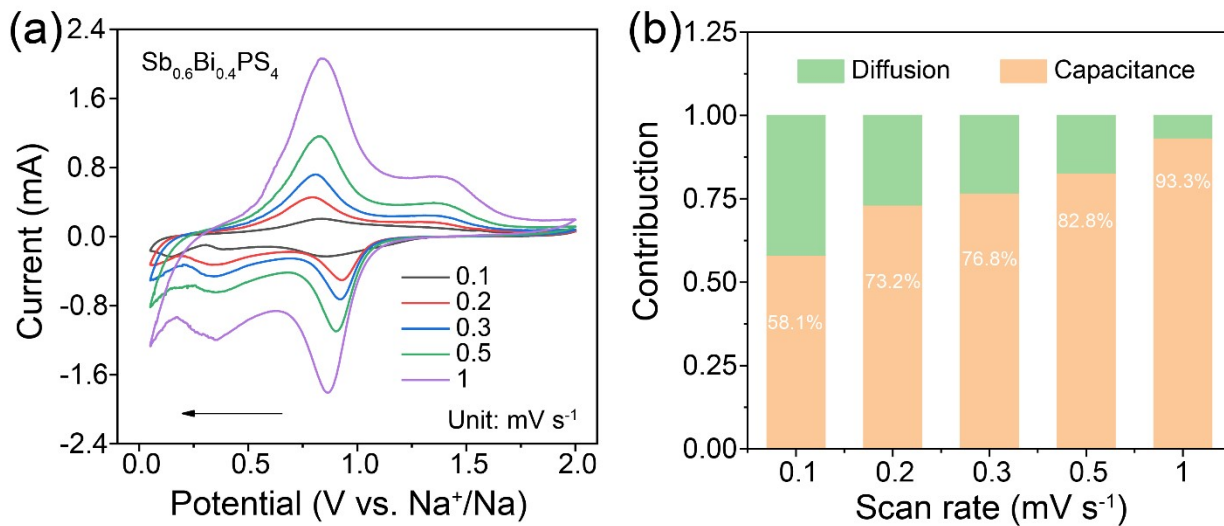

**Fi**

**Figure S8.** Sb<sub>0.6</sub>Bi<sub>0.4</sub>PS<sub>4</sub> material of (a) CV curves at different scan rates, (b) Normalized contribution ratio of capacitive and diffusion-controlled capacities.

## 2.4 Full cell Application

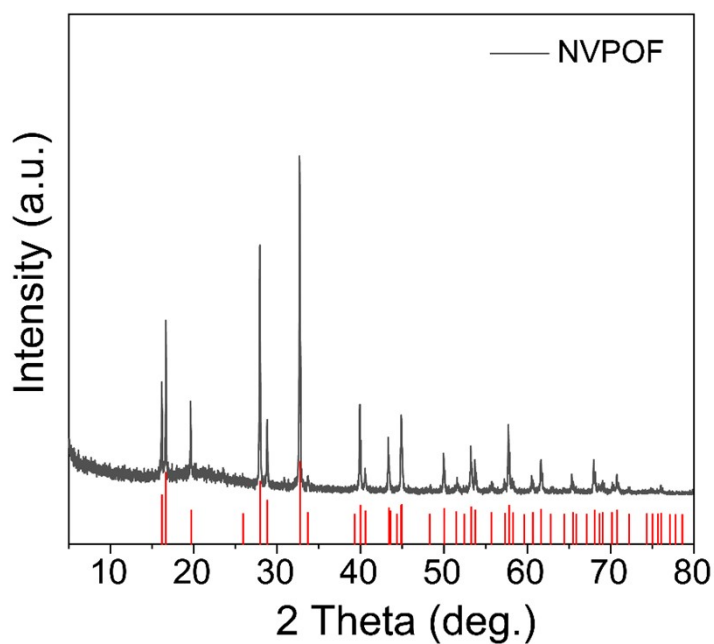

**Figure S9.** XRD of Na<sub>3</sub>V<sub>2</sub>(PO<sub>4</sub>)<sub>2</sub>O<sub>2</sub>F materials.

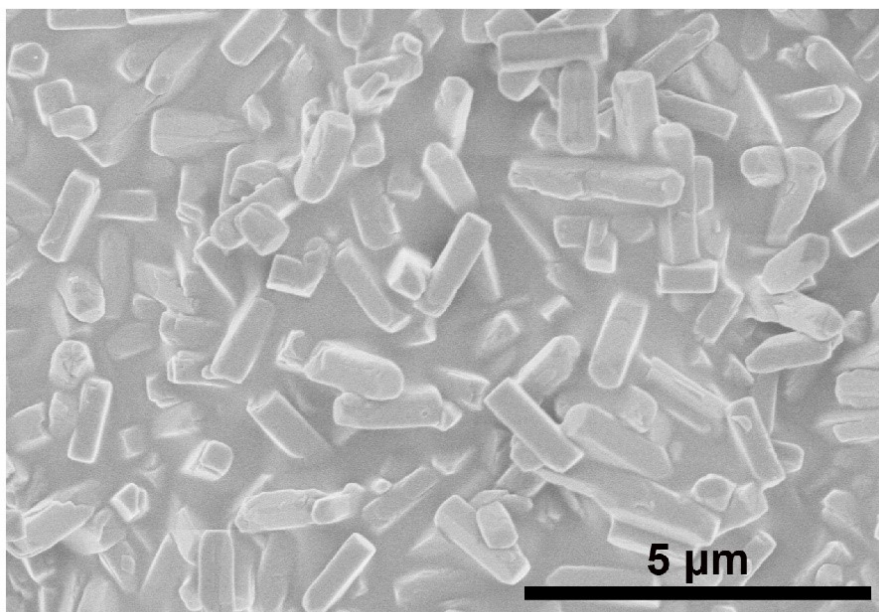

**Figure S10.** SEM of Na<sub>3</sub>V<sub>2</sub>(PO<sub>4</sub>)<sub>2</sub>O<sub>2</sub>F materials.

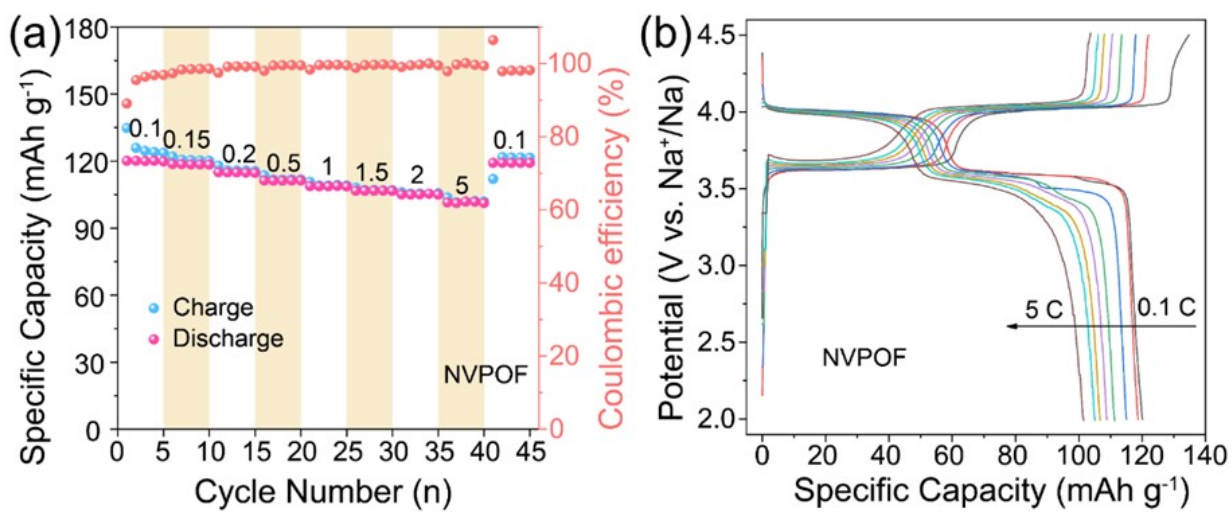

**Figure S11.** Electrochemical properties of Na<sub>3</sub>V<sub>2</sub>(PO<sub>4</sub>)<sub>2</sub>O<sub>2</sub>F in half cells:(a) Rate capabilities from 0.1 C to 5 C and (b) the corresponding galvanostatic curves.

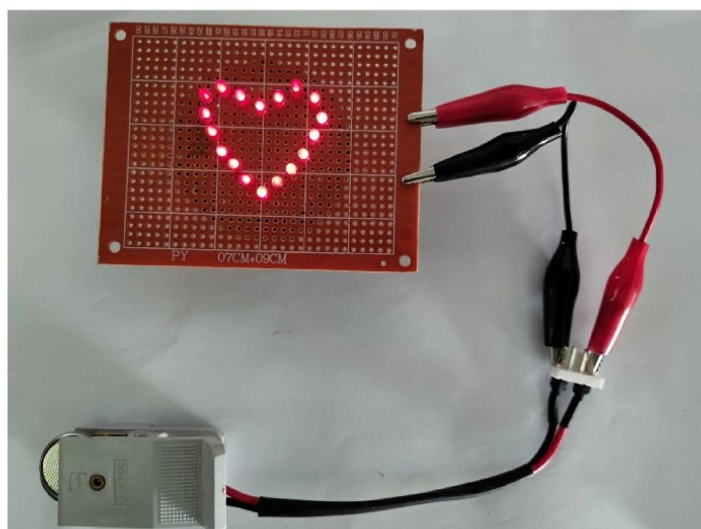

**Figure S12.** Practical demonstrations of coin-type full battery for lighting LED bulbs.

**Table S1** Comparison of  $\text{Sb}_{0.7}\text{Bi}_{0.3}\text{PS}_4$  materials from our work with previously reported ones of anode materials for sodium ion batteries.

| Materials                                   | Synthesis methods | Electrochemical activity                           | Ref       |
|---------------------------------------------|-------------------|----------------------------------------------------|-----------|
| $\text{Sb}_{0.7}\text{Bi}_{0.3}\text{PS}_4$ | Annealing         | 831 mA h g <sup>-1</sup> (0.1A g <sup>-1</sup> )   | This work |
| FeP@OCF                                     | Phosphorization   | 634 mA h g <sup>-1</sup> (0.1A g <sup>-1</sup> )   | [3]       |
| $\text{Sn}_{4+x}\text{P}_3$ @(Sn-P)         | Ball milling      | 502 mA h g <sup>-1</sup> (0.1 A g <sup>-1</sup> )  | [4]       |
| $\text{SnO}_{2-x}/\text{C}$                 | Electrospinning   | 650 mAh g <sup>-1</sup> (0.1 A g <sup>-1</sup> )   | [5]       |
| Sb/C                                        | Electrospinning   | 422 mA h g <sup>-1</sup> (0.1 A g <sup>-1</sup> )  | [6]       |
| Bi@N-C                                      | Solvothermal      | 478 mA h g <sup>-1</sup> (0.05 A g <sup>-1</sup> ) | [7]       |
| Bi/rGO                                      | Ball-milling      | 470 mA h g <sup>-1</sup> (0.05 A g <sup>-1</sup> ) | [8]       |
| BiPS <sub>4</sub>                           | Solvothermal      | 558 mA h g <sup>-1</sup> (0.1 A g <sup>-1</sup> )  | [9]       |
| MnPS <sub>3</sub>                           | Annealing         | 246 mA h g <sup>-1</sup> (0.1A g <sup>-1</sup> )   | [10]      |

## References

- 1 C. D. Malliakas and M. G. Kanatzidis, *J. Am. Chem. Soc.*, 2006, **128**, 6538-6539.
- 2 J. Z. Guo, P. F. Wang, X. L. Wu, X. H. Zhang, Q. Yan, H. Chen, J. P. Zhang and Y. G. Guo, *Adv. Mater.*, 2017, **29**, 1701968.
- 3 S. Shi, C. Sun, X. Yin, L. Shen, Q. Shi, K. Zhao, Y. Zhao and J. Zhang, *Adv. Funct. Mater.*, 2020,

**30**, 1909283.

- 4 W. Li, S.-L. Chou, J.-Z. Wang, J. H. Kim, H.-K. Liu and S.-X. Dou, *Adv. Mater.*, 2014, **26**, 4037-4042.
- 5 D. Ma, Y. Li, H. Mi, S. Luo, P. Zhang, Z. Lin, J. Li and H. Zhang, *Angew. Chem. Int. Ed.*, 2018, **57**, 8901-8905.
- 6 Y. Yuan, S. Jan, Z. Wang and X. Jin, *J. Mater. Chem. A*, 2018, **6**, 5555-5559.
- 7 H. Yang, R. Xu, Y. Yao, S. Ye, X. Zhou and Y. Yu, *Adv. Funct. Mater.*, 2019, **29**, 1809195.
- 8 Q. Zhang, J. Mao, W. K. Pang, T. Zheng, V. Sencadas, Y. Chen, Y. Liu and Z. Guo, *Adv. Energy Mater.*, 2018, **8**, 1703288.
- 9 L. Li, H. Jiang, N. Xu, X. Lian, H. Huang, H. Geng and S. Peng, *J. Mater. Chem. A*, 2021, **9**, 17336-17343.
- 10 Y. Sang, X. Wang, X. Cao, G. F. Ding, Y. H. Ding, Y. N. Hao, N. Xu, H. Z. Yu, L. L. Li and S. J. Peng, *J. Alloys Compd.*, 2020, **831**, 154775.
